# Supplementary material for: Neuroprotective Effects and Metabolomics Study of Protopanaxatriol (PPT) on Cerebral Ischemia/Reperfusion Injury In Vitro and In Vivo
Source: MDPI journal article supplement (doi:10.3390/ijms24021789), 2023-01-16
Supplement: s1 [file s1]

## Electronic supplementary information

**Table S1.** The RSDs (%) of PI and RT in validation tests

| Tests            | ESI <sup>+</sup> mode |           | ESI <sup>-</sup> mode |           |
|------------------|-----------------------|-----------|-----------------------|-----------|
|                  | PI                    | RT        | PI                    | RT        |
| system stability | 1.81~4.73             | 0.31~1.24 | 1.60~4.62             | 0.25~1.80 |
| precision        | 0.83~3.36             | 0.14~0.28 | 1.65~3.31             | 0.18~0.55 |
| reproducibility  | 1.25~3.57             | 0.16~1.49 | 0.65~3.68             | 0.06~0.65 |
| Sample stability | 1.36~3.24             | 0.08~0.46 | 1.96~3.25             | 0.14~0.87 |

The abovementioned validation showed that the UPLC-QTOF-MS method was effective in terms of precision, repeatability, and stability.

**Table S2.** The consequences from metabolic pathways

| Pathway Name                                        | Match Status | p      | -log (p) | Holm p | FDR     | Impact |
|-----------------------------------------------------|--------------|--------|----------|--------|---------|--------|
| Phenylalanine, tyrosine and tryptophan biosynthesis | 1/4          | 0.0206 | 1.6881   | 1      | 0.5742  | 0.50   |
| Phenylalanine metabolism                            | 1/10         | 0.0516 | 1.2961   | 1      | 1       | 0.36   |
| Arachidonic acid metabolism                         | 1/36         | 0.1858 | 0.7651   | 1      | 1       | 0.31   |
| Sphingolipid metabolism                             | 3/21         | 0.1084 | 3.9390   | 0.0097 | 0.0097  | 0.14   |
| Glycerophospholipid metabolism                      | 9/36         | 0.1858 | 1.8712   | 1      | 0.56506 | 0.03   |

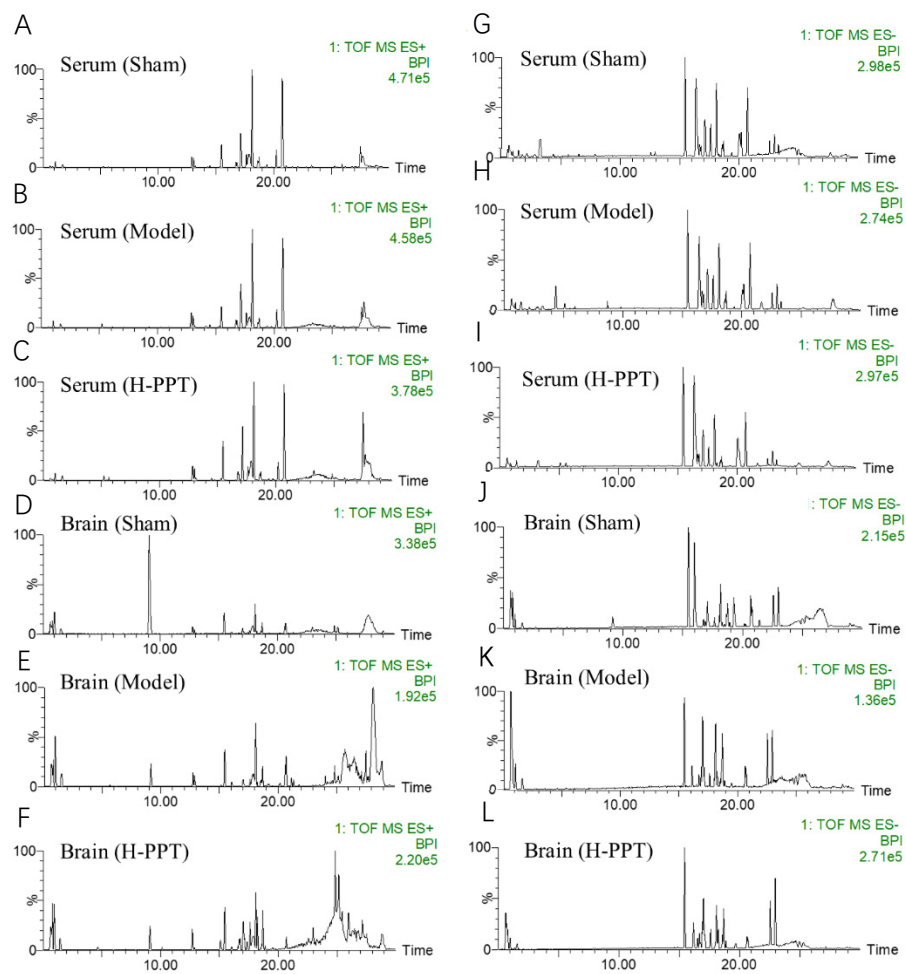

**Figure S1.** The serum and brain samples from the Sham, Model, and H-PPT groups are shown in the representative BPI chromatograms in positive (A-F) and negative (G-L) modes.
